# Supplementary material
Source: ML conference proceedings conference paper supplement (https://openaccess.thecvf.com/content/WACV2024/html/Katsumata_Revisiting_Latent_Space_WACV_2024_paper.html)
Supplement: Supplementary file 1 [file Katsumata_Revisiting_Latent_Space_WACV_2024_supplemental.pdf]

# Revisiting Latent Space of GAN Inversion for Robust Real Image Editing: Supplementary Material

Kai Katsumata<sup>1</sup> Duc Minh Vo<sup>1</sup> Bei Liu<sup>2</sup> Hideki Nakayama<sup>1</sup>

<sup>1</sup>The University of Tokyo, <sup>2</sup>Microsoft Research

{katsumata, vmduc, nakayama}@nlab.ci.i.u-tokyo.ac.jp, bei.liu@microsoft.com

Table A. Mean and variance of LPIPS and MSE losses on StyleGAN2 with Car and Church dataset. The proposed latent space  $\mathcal{F}/\mathcal{Z}^+$  outperforms baseline spaces excepting unregularized one.

| Cat    |                             |                                  |                           |                             |
|--------|-----------------------------|----------------------------------|---------------------------|-----------------------------|
| Space  | $\mathcal{F}/\mathcal{W}^+$ | $\mathcal{F}/\mathcal{W}^+(P_N)$ | $\mathcal{F}/\mathcal{Z}$ | $\mathcal{F}/\mathcal{Z}^+$ |
| LPIPS  | 0.1031 ± 0.0287             | 0.1731 ± 0.0445                  | 0.1849 ± 0.0394           | <b>0.1501 ± 0.0392</b>      |
| MSE    | 0.0186 ± 0.0129             | 0.0319 ± 0.0189                  | 0.0384 ± 0.0190           | <b>0.0296 ± 0.0198</b>      |
| Church |                             |                                  |                           |                             |
| Space  | $\mathcal{F}/\mathcal{W}^+$ | $\mathcal{F}/\mathcal{W}^+(P_N)$ | $\mathcal{F}/\mathcal{Z}$ | $\mathcal{F}/\mathcal{Z}^+$ |
| LPIPS  | 0.0904 ± 0.0243             | 0.1430 ± 0.0384                  | 0.1368 ± 0.0385           | <b>0.1150 ± 0.0320</b>      |
| MSE    | 0.0321 ± 0.0156             | 0.0514 ± 0.0232                  | 0.0482 ± 0.0235           | <b>0.0423 ± 0.0205</b>      |

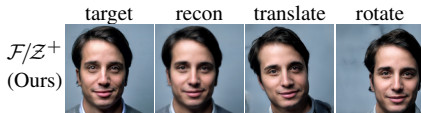

Figure A. Editing examples of geometric operations.

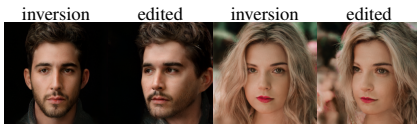

Figure B. Examples of spatial attribute editing.

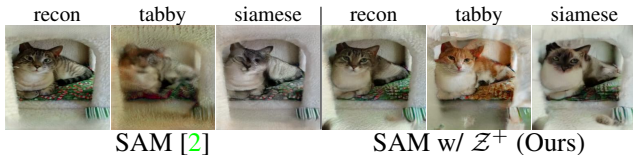

Figure C. Editing examples of StyleGAN2 LSUN Cat.

## A. Additional results

We show additional quantitative results of GAN inversion in Tab. A. The  $\mathcal{F}/\mathcal{Z}^+$  space achieves better reconstruction quality on several datasets. Table B shows the quantitative comparison with additional baseline methods.

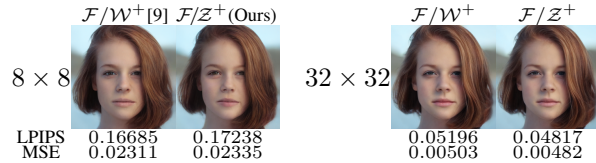

Figure D. Ablation studies on spatial code size.

As discussed in [1], our  $\mathcal{F}/\mathcal{Z}^+$  space naturally can do geometric transformation. Furthermore, we show the examples of geometric transformations by  $\mathcal{F}/\mathcal{Z}^+$  in Fig. A. Figure B shows the examples of spatial attribute editing. We provides editing examples of StyleGAN2 trained on the LSUN Cat dataset in Fig. C. In comparison to original SAM [2], Our approach can edit real images properly. Figure D demonstrates that  $\mathcal{F}/\mathcal{Z}^+$  performs well even different spatial code size.

We also show additional qualitative results of editing quality evaluation in Figs. E to H. As shown in Figs. E to H, our proposed space maintains the image quality after editing on several data domains.

## B. Image credits

From top to bottom in Fig. 2,

- <https://unsplash.com/photos/7YVZYZeITc8> (photo by [unsplash.com/@juricakoletic](https://unsplash.com/@juricakoletic)),
- <https://unsplash.com/photos/rDEOVtE7vOs> (photo by [unsplash.com/@chrisjoelcampbell](https://unsplash.com/@chrisjoelcampbell)),
- <https://unsplash.com/photos/iLip77SbmOE> (photo by [unsplash.com/@albertdera](https://unsplash.com/@albertdera)),
- <https://unsplash.com/photos/m663zRzRe40> (photo by [unsplash.com/@rowankyle](https://unsplash.com/@rowankyle)), and
- <https://unsplash.com/photos/gGTGjnWCLEM> (photo by [unsplash.com/@tuvaloland](https://unsplash.com/@tuvaloland)).

Table B. Quantitative comparison of latent spaces with the average MSE loss and SSIM on 50 CelebA-HQ samples.

| Space | $\mathcal{Z}$ | $\mathcal{Z}^+$ | $\mathcal{W}^+(P_N)$ | $\mathcal{W}^+$ | $\mathcal{F}/\mathcal{Z}$ | $\mathcal{F}/\mathcal{Z}^+$ (Ours) | $\mathcal{F}/\mathcal{W}^+(P_N)$ [1] | IDInvert [3] |
|-------|---------------|-----------------|----------------------|-----------------|---------------------------|------------------------------------|--------------------------------------|--------------|
| MSE   | 0.18149       | 0.12117         | 0.11965              | 0.04872         | 0.02679                   | <b>0.01742</b>                     | <b>0.01743</b>                       | 0.02155      |
| SSIM  | 0.61155       | 0.68930         | 0.68190              | 0.76101         | 0.78965                   | <b>0.81477</b>                     | <b>0.81479</b>                       | 0.64993      |

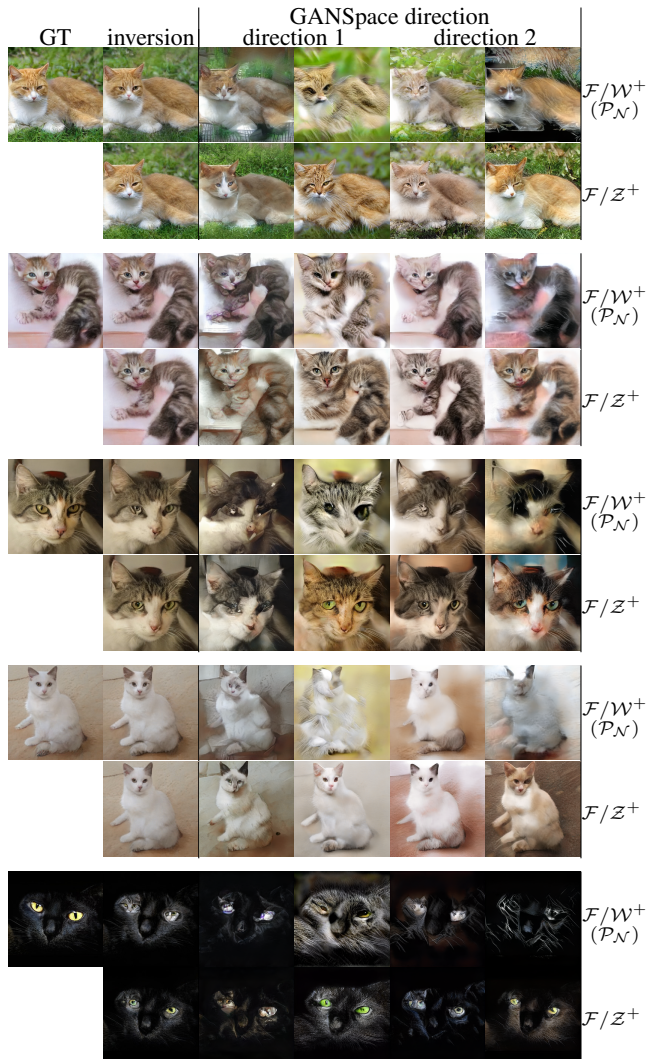

Figure E. Editability study with real semantic directions on StyleGAN2 with the Cat dataset.

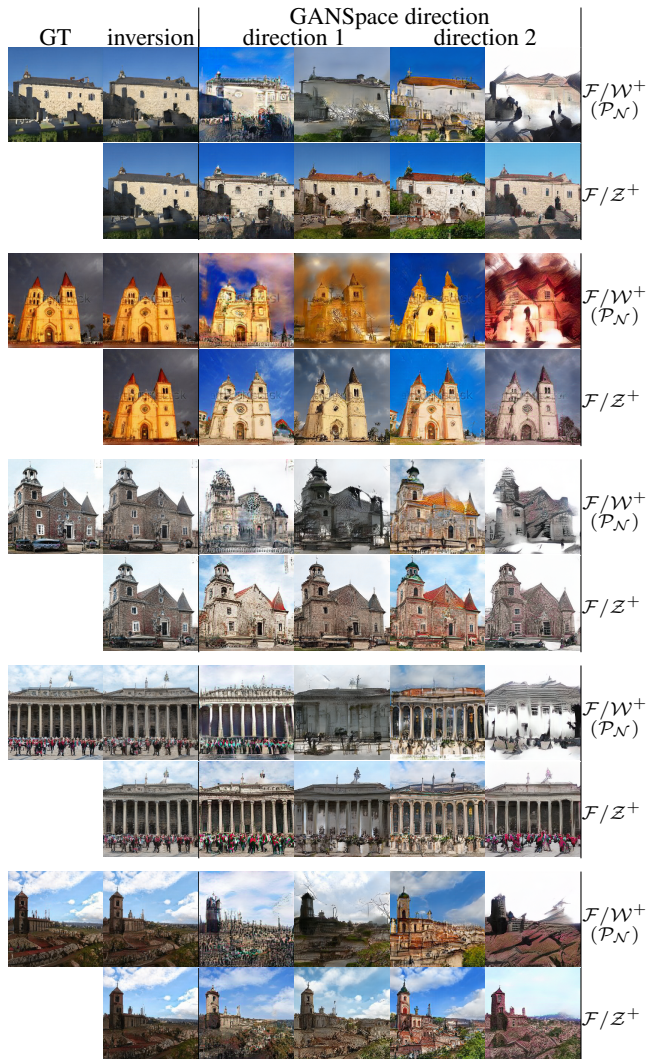

Figure F. Editability study with real semantic directions on StyleGAN2 with the Church dataset.

## References

- [1] Kyoungkook Kang, Seongtae Kim, and Sunghyun Cho. Gan inversion for out-of-range images with geometric transformations. In *Proceedings of the IEEE/CVF International Conference on Computer Vision (ICCV)*, pages 13941–13949, October 2021. 1, 2
- [2] Gaurav Parmar, Yijun Li, Jingwan Lu, Richard Zhang, Jun-Yan Zhu, and Krishna Kumar Singh. Spatially-adaptive multilayer selection for gan inversion and editing. In *CVPR*, pages 11399–11409, 2022. 1
- [3] Jiapeng Zhu, Yujun Shen, Deli Zhao, and Bolei Zhou. In-domain gan inversion for real image editing. In *European conference on computer vision*, pages 592–608. Springer, 2020. 2

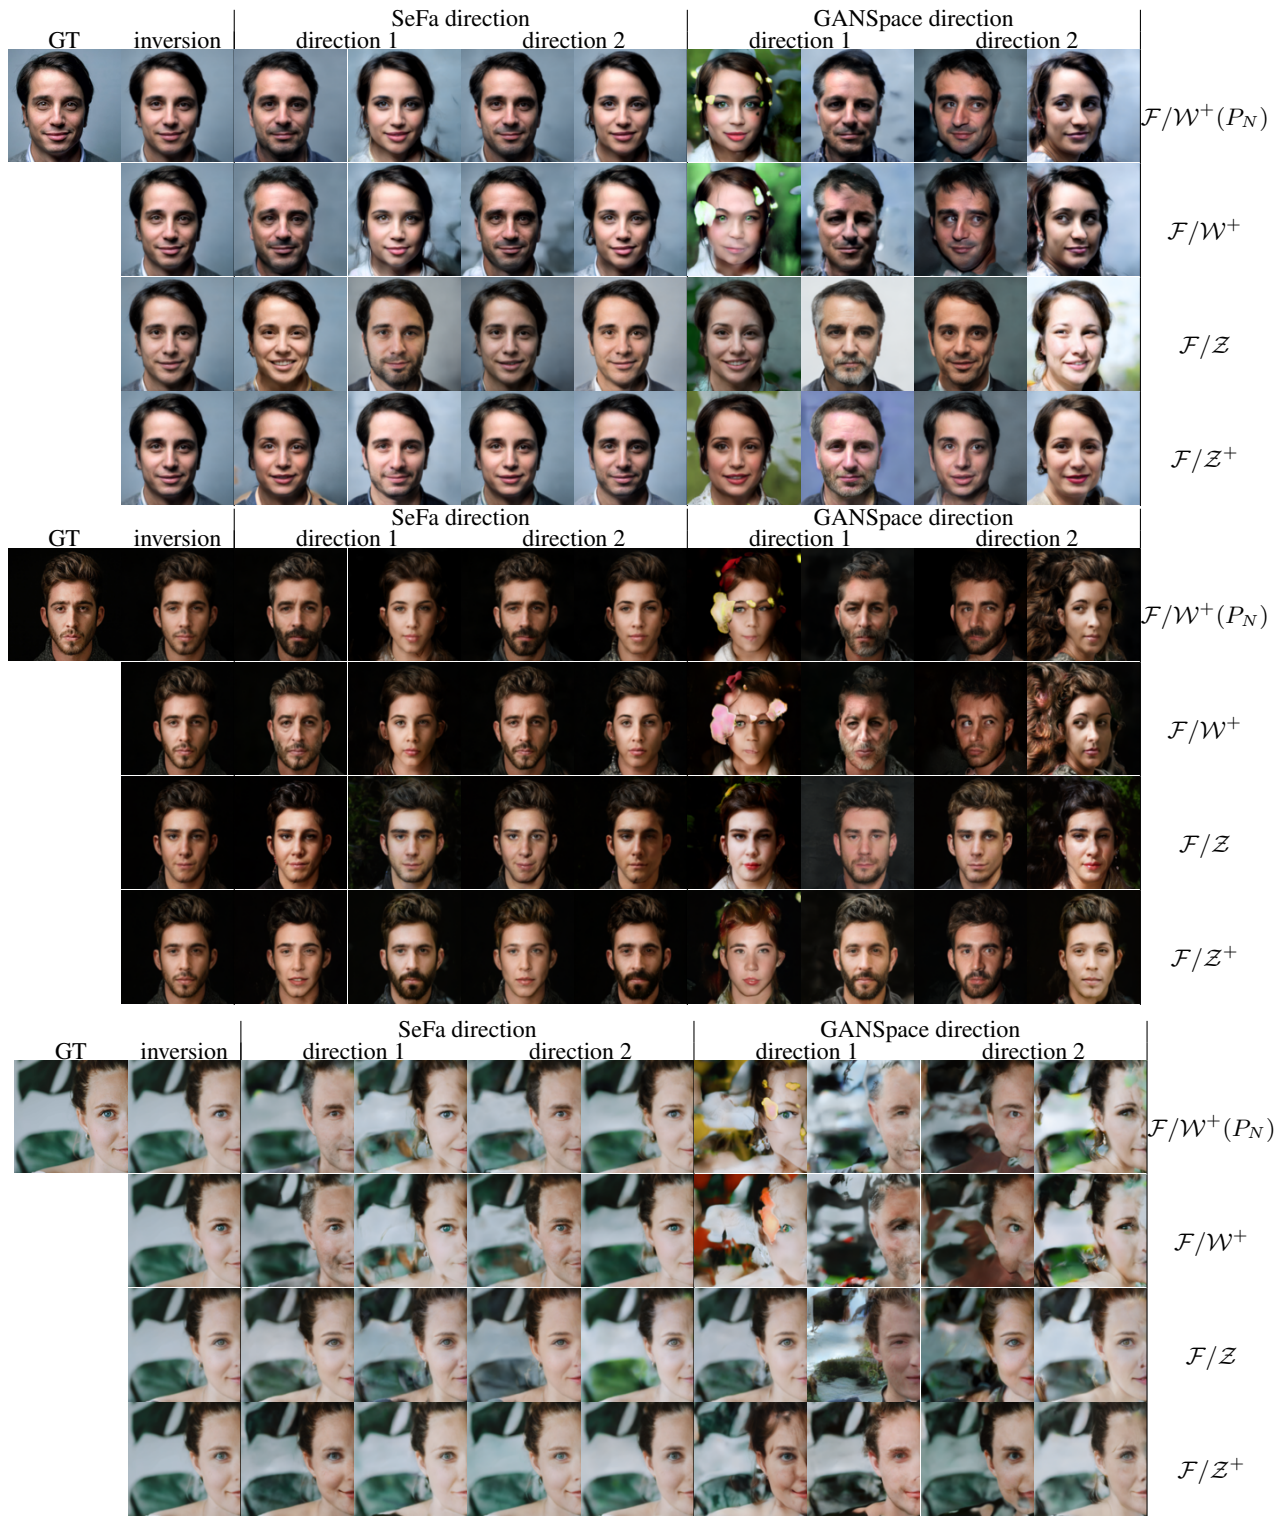

Figure G. Editability study with real semantic directions. The proposed space  $\mathcal{F}/\mathcal{Z}^+$  properly edits the inverted images.

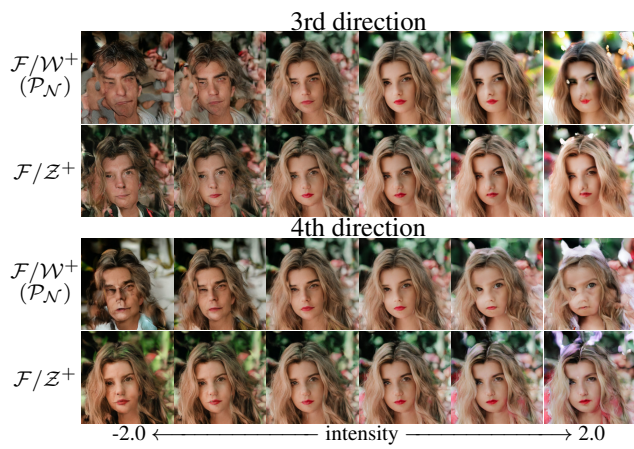

Figure H. Results of stepwise editing. Although the  $\mathcal{F}/\mathcal{W}^+(\mathcal{P}_{\mathcal{N}})$  space loses image fidelity with strong editing, our space maintains image fidelity.
